# Supplementary material for: High-Yield Characterization of Single Molecule Interactions with DeepTipTM Atomic Force Microscopy Probes
Source: MDPI journal article supplement (doi:10.3390/molecules28010226), 2022-12-27
Supplement: s1 [file s1]

## Supplementary Material

### High-Yield Characterization of Single Molecule Interactions with DeepTip™ Atomic Force Microscopy Probes

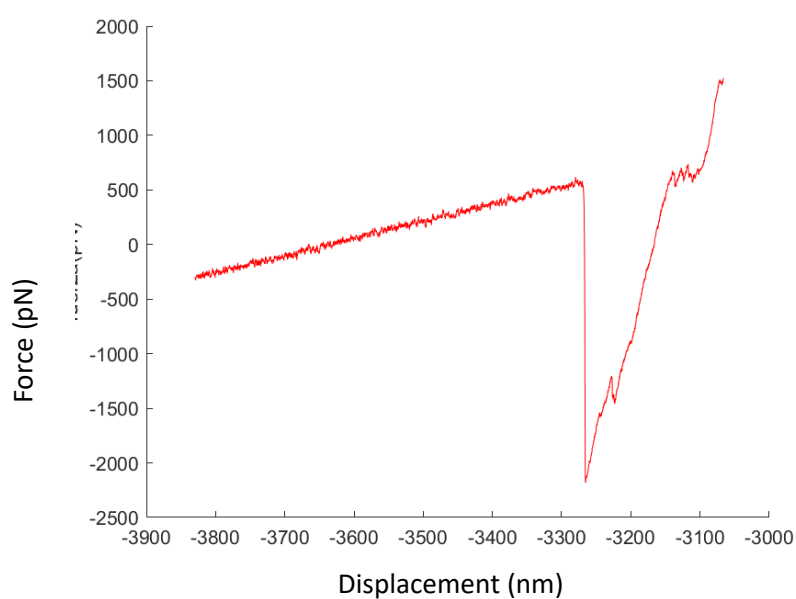

Supplementary Figure S1. Example of a curve discarded from the analysis as anomalous.
